# Supplementary material
Source: Springer Nature journal article supplement (https://www.springermedizin.de/resource/supplementary/12891_2009_954_MOESM1_ESM.pdf/9506784)

**A**

Heat-inactivation □- ■+

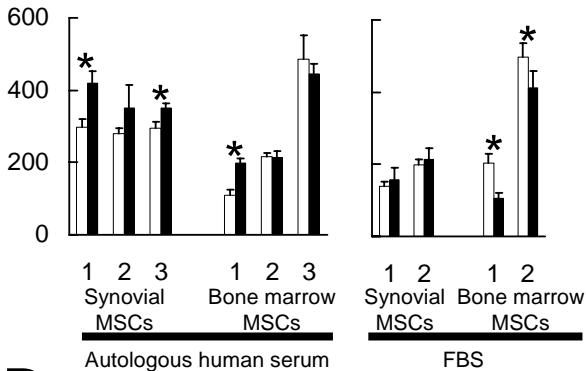**B**

Heat-inactivation □- ■+

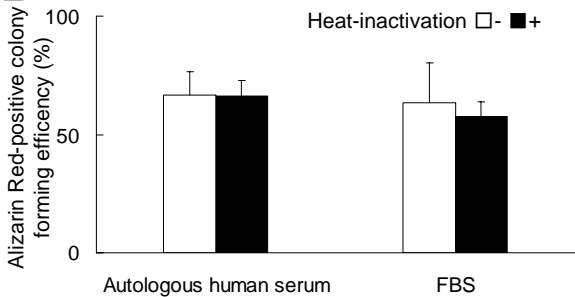

Supplement: MOESM1 [file 9506784]
